# Supplementary material
Source: Springer Nature journal article supplement (https://www.springermedizin.de/resource/supplementary/12889_2011_4919_MOESM2_ESM.pdf/9493714)

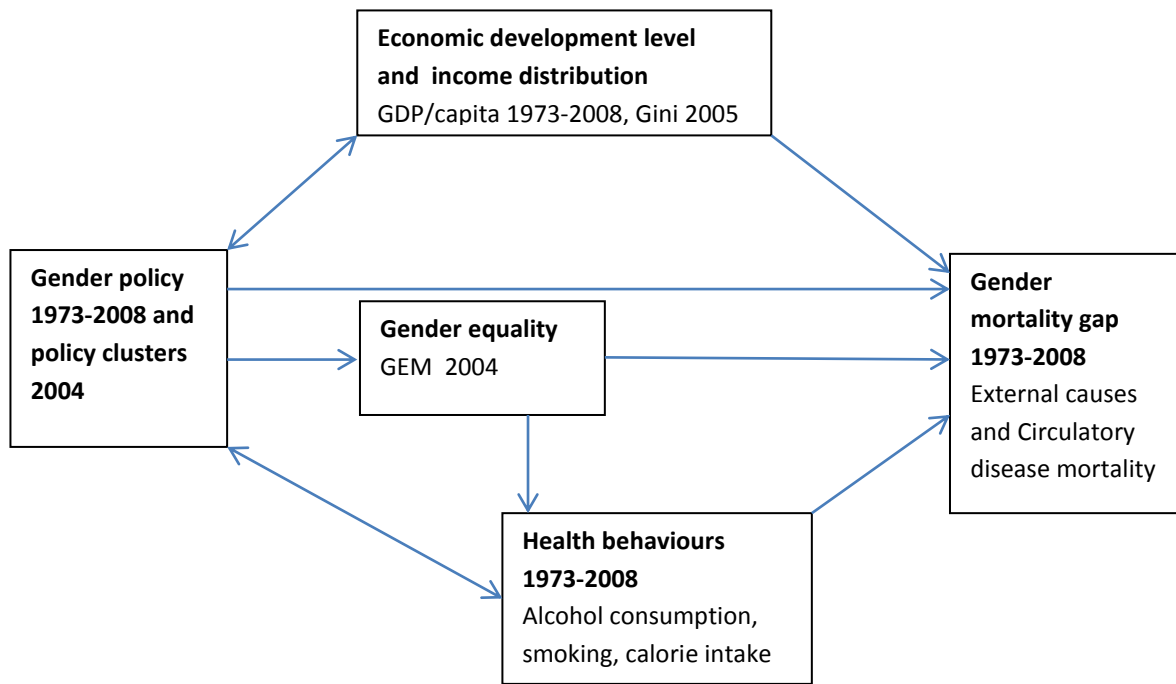

Supplement: MOESM2 [file 9493714]
